# Supplementary material for: Early life characteristics and late life burden of cerebral small vessel disease in the Lothian Birth Cohort 1936
Source: publisher site journal article supplement (doi:10.18632/aging.101043), 2016-09-19
Supplement: Supplementary file 1 [file aging-v8i9-101043-supplementary-material-SD1.pdf]

SUPPLEMENTARY MATERIAL

**Supplementary Table e-1. Characteristics of all Wave 2 participants and of those with complete MRI data**

|                                                           | Missing MRI data<br>(n=186)        | With complete MRI data<br>(n=680)   |
|-----------------------------------------------------------|------------------------------------|-------------------------------------|
| Age, mean, SD                                             | 72.53 (.73)                        | 72.55 (.71)                         |
| Female, n(%)                                              | 97 (52.2)                          | 321 (47.2)                          |
| Age at leaving full-time education, y,<br>mean (SD)       | 15.69 (1.14)                       | 15.81 (1.14)                        |
| Number of years of full-time education,<br>y, mean, SD    | 10.69 (1.15)                       | 10.81 (1.14)                        |
| Education, highest qualification, n(%)                    | <i>Missing=0</i>                   | <i>Missing=2</i>                    |
| No qualification                                          | 37 (19.9)                          | 116 (17.1)                          |
| O-level/equivalent                                        | 72 (38.7)                          | 258 (38.1)                          |
| A-level/equivalent                                        | 33 (17.7)                          | 111 (16.4)                          |
| Semiprofessional/professional                             | 21 (11.3)                          | 83 (12.2)                           |
| Degree                                                    | 23 (12.4)                          | 110 (16.2)                          |
| Own job class, n(%)                                       | <i>Missing=5</i>                   | <i>Missing=11</i>                   |
| I                                                         | 29 (15.6)                          | 137 (20.5)                          |
| II                                                        | 71 (38.2)                          | 252 (37.7)                          |
| IIIN                                                      | 44 (23.7)                          | 141 (21.1)                          |
| IIIM                                                      | 32 (17.2)                          | 111 (16.6)                          |
| IV                                                        | 4 (2.2)                            | 24 (3.6)                            |
| V                                                         | 1 (.5)                             | 4 (.6)                              |
| Age-11 IQ, mean (SD)                                      | <i>Missing=0</i><br>100.05 (14.78) | <i>Missing=36</i><br>100.84 (15.32) |
| Age-11 deprivation index                                  | <i>Missing=0</i><br>-.117 (2.297)  | <i>Missing=7</i><br>-.075 (2.328)   |
| Father's job class, age-11, n(%)                          | <i>Missing=20</i>                  | <i>Missing=58</i>                   |
| I                                                         | 16 (8.6)                           | 40 (6.4)                            |
| II                                                        | 31 (16.7)                          | 122 (19.6)                          |
| III                                                       | 88 (47.3)                          | 351 (56.4)                          |
| IV                                                        | 12 (6.5)                           | 67 (10.8)                           |
| V                                                         | 19 (10.2)                          | 42 (6.8)                            |
| Father's number of yrs of education,<br>age-11, mean (SD) | <i>Missing=45</i><br>9.84 (2.48)   | <i>Missing=147</i><br>10.02 (2.21)  |

**Supplementary Table e-2. Early life factor associations with total SVD score in ordinal regression analyses**

|                                                       | <b>Crude OR (95% CI)</b> | <b>p</b> |
|-------------------------------------------------------|--------------------------|----------|
| Female                                                | .97 (.74-1.29)           | .86      |
| Age                                                   | 1.25 (1.03 – 1.53)       | .03      |
| Highest educational qualification                     |                          |          |
| Degree                                                | .97 (.74 – 1.29)         | .26      |
| Semi-professional/professional                        | 1.23 (.77 – 1.96)        | .69      |
| A-level/equivalent                                    | .94 (.81 – 1.08)         | .37      |
| O-level/equivalent                                    | 1.11 (.65 – 1.89)        | .71      |
| None                                                  | Ref                      |          |
| Education dichotomized,<br>O-level or above vs. none  | .76 (.53 – 1.11)         | .16      |
| Own job class                                         |                          |          |
| 5                                                     | 1.01 (.16 – 6.55)        | .99      |
| 4                                                     | .44 (.18 – 1.07)         | .07      |
| 3.5                                                   | 1.84 (1.15 – 2.92)       | .01      |
| 3                                                     | 1.17 (.75 – 1.81)        | .48      |
| 2                                                     | .98 (.66 – 1.45)         | .92      |
| 1                                                     | Ref                      |          |
| Own job class dichotomized<br>III - V vs. I - II      | .76 (.57-1.01)           | .54      |
| Age-11 deprivation score per point                    | 1.03 (.81 – 1.10)        | .30      |
| Age-11 IQ, per SD                                     | .94 (.82-1.08)           | .36      |
| Father's job class                                    |                          |          |
| 5                                                     | 1.17 (.51 – 2.67)        | .71      |
| 4                                                     | 1.40 (.66 – 2.91)        | .39      |
| 3                                                     | 1.52 (.82 – 2.85)        | .18      |
| 2                                                     | 1.46 (.74 – 2.89)        | .28      |
| 1                                                     | Ref                      |          |
| Father's job class dichotomized<br>III - V vs. I - II | .90 (.65-1.26)           | .54      |
| Years of education                                    | .97 (.86 – 1.10)         | .66      |
| Age left education                                    | .97 (.86-1.10)           | .67      |

**Supplementary Table e-3. Early life factor associations with dichotomized SVD score and components, univariate logistic regression analyses**

| <b>Presence of Moderate to Severe cSVD</b>                        |                          |          |
|-------------------------------------------------------------------|--------------------------|----------|
|                                                                   | <b>Crude OR (95% CI)</b> | <b>p</b> |
| Female                                                            | 1.53 (1.04 – 2.25)       | .03      |
| Age                                                               | 1.43 (1.09 – 1.89)       | .01      |
| Education, highest qualification, n(%)                            |                          |          |
| No qualification                                                  | Ref                      |          |
| O-level/equivalent                                                | .76 (.46 – 1.27)         | .29      |
| A-level/equivalent                                                | .41 (.21 - .83)          | .01      |
| Semiprofessional/profess.                                         | .53 (.26 - 1.10)         | .09      |
| Degree                                                            | .56 (.29 – 1.08)         | .08      |
| Education, dichotomized<br>No qualification vs. O-level or higher | .61 (.38 - .98)          | .04      |
| Own job class                                                     |                          |          |
| 5                                                                 | 1.74 (.17 – 17.53)       | .64      |
| 4                                                                 | .48 (.10 – 2.17)         | .34      |
| 3.5                                                               | 2.12 (1.15 – 3.91)       | .02      |
| 3                                                                 | .28 (.76 – 2.57)         | .28      |
| 2                                                                 | 1.00 (.57 – 1.75)        | .99      |
| 1                                                                 |                          |          |
| Dichotomized own job class<br>.I – II vs. III - V                 | .64 (.43 - .93)          | .02      |
| Age-11 deprivation score                                          | 1.08 (1.00 – 1.16)       | .06      |
| Age-11 IQ, per SD                                                 | 0.80 (0.66 – 0.96)       | .02      |
| Father's job class,                                               |                          |          |
| 5                                                                 | 1.30 (.27 - 6.20)        | .74      |
| 4                                                                 | 3.14 (.84 – 11.69)       | .09      |
| 3                                                                 | 3.45 (1.04 – 11.46)      | .04      |
| 2                                                                 | 2.28 (.64 – 8.14)        | .21      |
| 1                                                                 | Ref                      |          |
| Dichotomized father's job class<br>I – II vs. III - V             | .60 (.37 -.99)           | .05      |
| Years of education                                                | 0.88 (0.74– 1.05)        | .16      |
| Age left education                                                | 0.88 (0.74 – 1.05)       | .17      |

**Supplementary Table e-3. Continue**

| <b>Presence of moderate to severe WMH</b>                         |                          |          |
|-------------------------------------------------------------------|--------------------------|----------|
|                                                                   | <b>Crude OR (95% CI)</b> | <b>p</b> |
| Female                                                            | 1.57 (1.09 – 2.25)       | .02      |
| Age                                                               | 1.33 (1.03 – 1.72)       | .03      |
| Education, highest qualification, n(%)                            |                          |          |
| No qualification                                                  | Ref                      |          |
| O-level/equivalent                                                | 1.01 (.61 – 1.68)        | .96      |
| A-level/equivalent                                                | .52 (.27 – 1.03)         | .06      |
| Semiprofessional/profess                                          | .99 (.51 – 1.90)         | .96      |
| Degree                                                            | .87 (.47 – 1.60)         | .65      |
| Education, dichotomized<br>No qualification vs. O-level or higher | .88 (.55 – 1.39)         | .57      |
| Dichotomized own job class<br>I – II vs. III - V                  | .68 (.48 - .98)          | .04      |
| Age-11 deprivation score                                          | 1.02 (.95-1.10)          | .57      |
| Age-11 IQ, per SD                                                 | .85 (0.71 – 1.01)        | .07      |
| Dichotomized father’s job class<br>I – II vs. III - V             | .69 (.44-1.09)           | .11      |
| Years of education                                                | .97 (.83-1.14)           | .70      |
| Age left education                                                | .97 (0.82 – 1.13)        | .67      |
| <b>Presence of microbleeds</b>                                    |                          |          |
| Female                                                            | .83 (.52-1.33)           | .43      |
| Age                                                               | 1.55 (1.11 - 1.18)       | .01      |
| Education, highest qualification, n(%)                            |                          |          |
| No qualification                                                  | Ref                      | .09      |
| O-level/equivalent                                                | .60 (.32 – 1.09)         | .12      |
| A-level/equivalent                                                | .55 (.26 – 1.18)         | .10      |
| Semiprofessional/profess                                          | .48 (.20 – 1.15)         | .02      |
| Degree                                                            | .36 (.15 - .84)          |          |
| Education, dichotomized<br>No qualification vs. O-level or higher | .52 (.30 - .90)          | .02      |
| Dichotomized own job class<br>I – II vs. III - V                  | .69 (.43 – 1.11)         | .12      |
| Age-11 deprivation score                                          | 1.54 (.69-3.45)          | .29      |
| Age-11 IQ, per SD                                                 | .90 (.72-1.13)           | .36      |
| Dichotomized father’s job class<br>I – II vs. III - V             | .79 (.44 - 1.41)         | .43      |
| Years of education                                                | .91 (.74-1.13)           | .40      |
| Age left education                                                | .92 (.74-1.13)           | .41      |

**Supplementary Table e-3. Continue**

| <b>Presence of lacunes</b>                                        |                          |          |
|-------------------------------------------------------------------|--------------------------|----------|
|                                                                   | <b>Crude OR (95% CI)</b> | <b>p</b> |
| Female                                                            | .93 (.46-1.88)           | .84      |
| Age                                                               | 1.45 (.88-2.41)          | .15      |
| Education, highest qualification, n(%)                            |                          |          |
| No qualification                                                  | Ref                      |          |
| O-level/equivalent                                                | .89 (.35 – 2.28)         | .81      |
| A-level/equivalent                                                | .74 (.23 – 2.39)         | .61      |
| Semiprofessional/profess                                          | .19 (.02 – 1.57)         | .12      |
| Degree                                                            | .90 (.29 – 2.76)         | .85      |
| Education, dichotomized<br>No qualification vs. O-level or higher | .76 (.32 – 1.78)         | .52      |
| Dichotomized own job class                                        |                          |          |
| I – II vs. III - V                                                | .74 (.37 – 1.49)         | .39      |
| Age-11 deprivation score                                          | .83 (.27-2.56)           | .75      |
| Age-11 IQ, per SD                                                 | .79 (.58-1.09)           | .15      |
| Dichotomized father's job class<br>I – II vs. III - V             | 1.64 (.78 – 3.46)        | .19      |
| Years of education                                                | 1.08 (.80-1.46)          | .61      |
| Age left education                                                | 1.08 (0.803-1.462)       | .60      |
| <b>Presence of moderate to severe EPVS</b>                        |                          |          |
| Female                                                            | .88 (0.65-1.19)          | .41      |
| Age                                                               | .98 (.90-1.06)           | .54      |
| Education, highest qualification, n(%)                            |                          |          |
| No qualification                                                  | Ref                      |          |
| O-level/equivalent                                                | .79 (.51 – 1.23)         | .30      |
| A-level/equivalent                                                | .75 (.44 – 1.27)         | .29      |
| Semiprofessional/profess                                          | .90 (.51 – 1.59)         | .71      |
| Degree                                                            | .85 (.50 – 1.44)         | .55      |
| Education, dichotomized<br>No qualification vs. O-level or higher | .81 (.54 – 1.21)         | .30      |
| Dichotomized own job class                                        |                          |          |
| I – II vs. III - V                                                | .93 (.68 – 1.27)         | .64      |
| Age-11 deprivation score                                          | 1.23 (.74-2.06)          | .42      |
| Age-11 IQ, per SD                                                 | 1.03 (.88-1.20)          | .75      |
| Dichotomized father's job class<br>I – II vs. III - V             | 1.01 (.70 – 1.44)        | .96      |
| Years of education                                                | .99 (.87-1.14)           | .91      |
| Age left education                                                | 1.00 (.87-1.14)          | .96      |

**Supplementary Table e-4. Baseline characteristics by sex**

|                                                   | Male                     | Female                   | p      |
|---------------------------------------------------|--------------------------|--------------------------|--------|
| Age-11 IQ, mean (SD)                              | 99.08 (15.51)            | 100.99 (13.53)           | .008   |
| Age-11 Deprivation Index, mean (SD)               | .130 (2.544)             | -.137 (2.239)            | .02    |
| Number of years of full-time education, mean (SD) | 10.75 (1.16)             | 10.73 (1.10)             | .18    |
| Highest educational attainment, n(%)              |                          |                          | <.0001 |
| None                                              | 105 (19.2)               | 88 (16.2)                |        |
| O-level                                           | 177 (32.4)               | 253 (46.7)               |        |
| A-level                                           | 111 (20.3)               | 71 (13.1)                |        |
| Semiprof/prof Degree                              | 60 (11.0)<br>94 (17.2)   | 66 (12.2)<br>64 (11.8)   |        |
| Own job class, n (%)                              |                          |                          | <.0001 |
| I                                                 | 95 (17.2)                | 95 (17.5)                |        |
| II                                                | 196 (35.8)               | 225 (41.4)               |        |
| IIIN                                              | 66 (12.0)                | 182 (33.5)               |        |
| IIIM                                              | 152 (27.7)               | 36 (6.6)                 |        |
| IV<br>V                                           | 34 (6.2)<br>5 (0.9)      | 4 (.7)<br>1 (.2)         |        |
| Dichot. own job, n(%)                             |                          |                          | .06    |
| I-II<br>III-V                                     | 291 (53.1)<br>257 (46.9) | 320 (58.9)<br>223 (41.1) |        |
| Father's job class, n (%)                         |                          |                          | .05    |
| I                                                 |                          |                          |        |
| II                                                | 33 (6.0)                 | 35 (6.4)                 |        |
| III                                               | 103 (18.8)               | 89 (16.4)                |        |
| IV                                                | 340 (62.0)               | 323 (59.5)               |        |
| V                                                 | 33 (6.0)<br>39 (7.1)     | 60 (11.0)<br>36 (6.6)    |        |
| Dichot. father's job class, n (%)                 |                          |                          | .48    |
| I-II<br>III-V                                     | 136 (24.8)<br>412 (75.2) | 124 (22.8)<br>419 (77.2) |        |
| Mean age at MRI, y (SD)                           | 72.71 (.71)              | 72.76 (.74)              | .55    |
| Hypertension, n (%)                               | 218 (39.8)               | 215 (39.6)               | .95    |
| Diabetes, n (%)                                   | 63 (14.1)                | 32 (7.7)                 | .003   |
| Dyslipidemia, n (%)                               | 203 (37.1)               | 183 (33.7)               | .25    |
| Smoking, n (%)                                    |                          |                          | <.0001 |
| Never                                             | 220 (40.1)               | 281 (51.7)               |        |
| Former<br>Current                                 | 268 (48.9)<br>60 (10.9)  | 197 (36.3)<br>65 (12.0)  |        |

**Supplementary Table e-5. Multivariable logistic regression, association between sex and burden of cSVD**

**a. Univariate**

| Moderate to severe cSVD <sup>a</sup> |            | Sig. | Exp(B) | 95% Confidence Interval for Exp(B) |             |
|--------------------------------------|------------|------|--------|------------------------------------|-------------|
|                                      |            |      |        | Lower Bound                        | Upper Bound |
| 1.00                                 | Intercept  | .000 |        |                                    |             |
|                                      | Male sex   | .030 | .653   | .444                               | .960        |
|                                      | Female sex |      |        |                                    |             |

**b. + Highest qualifying education**

| Moderate to severe cSVD <sup>a</sup> |                  | P    | Exp(B) | 95% Confidence Interval for Exp(B) |             |
|--------------------------------------|------------------|------|--------|------------------------------------|-------------|
|                                      |                  |      |        | Lower Bound                        | Upper Bound |
| 1.00                                 | Intercept        | .000 |        |                                    |             |
|                                      | Male sex         | .023 | .632   | .425                               | .938        |
|                                      | Female sex       |      |        |                                    |             |
|                                      | No qualifying ed | .069 | 1.839  | .953                               | 3.550       |
|                                      | 0-level          | .444 | 1.261  | .697                               | 2.280       |
|                                      | A-level          | .393 | .719   | .337                               | 1.533       |
|                                      | Semi-pro/pro     | .799 | .903   | .413                               | 1.975       |
|                                      | Degree           |      |        |                                    |             |

**c. +Own job class (“Her Majesty’s Stationery Office [HMSO] social class”)**

| SVD dichot <sup>a</sup> |                  | Sig. | Exp(B) | 95% Confidence Interval for Exp(B) |             |
|-------------------------|------------------|------|--------|------------------------------------|-------------|
|                         |                  |      |        | Lower Bound                        | Upper Bound |
| 1.00                    | Intercept        | .496 |        |                                    |             |
|                         | Male sex         | .005 | .529   | .340                               | .824        |
|                         | Female sex       |      |        |                                    |             |
|                         | No qualifying ed | .463 | 1.328  | .622                               | 2.834       |
|                         | 0-level          | .954 | .980   | .500                               | 1.923       |
|                         | A-level          | .320 | .667   | .301                               | 1.481       |
|                         | Semi-pro/pro     | .815 | .909   | .408                               | 2.024       |
|                         | Degree           |      |        |                                    |             |
|                         | HMSO I           | .681 | .609   | .057                               | 6.478       |
|                         | HMSO II          | .688 | .622   | .061                               | 6.338       |
|                         | HMSO III N       | .809 | .751   | .073                               | 7.687       |
|                         | HMSO III M       | .734 | 1.494  | .148                               | 15.076      |
|                         | HMSO IV          | .468 | .368   | .025                               | 5.474       |
|                         | HMSO V           |      |        |                                    |             |

**Supplementary Table e-5. Continue**

**d. +Smoking**

| Moderate to severe cSVD <sup>a</sup> |                  | p    | Exp(B) | 95% Confidence Interval for Exp(B) |             |
|--------------------------------------|------------------|------|--------|------------------------------------|-------------|
|                                      |                  |      |        | Lower Bound                        | Upper Bound |
| 1.00                                 | Intercept        | .646 |        |                                    |             |
|                                      | Male sex         | .007 | .540   | .346                               | .843        |
|                                      | Female sex       |      |        |                                    |             |
|                                      | No qualifying ed | .424 | 1.364  | .637                               | 2.917       |
|                                      | O.level          | .972 | 1.012  | .513                               | 1.998       |
|                                      | A-level          | .393 | .704   | .315                               | 1.574       |
|                                      | Semi-pro/pro     | .824 | .913   | .410                               | 2.034       |
|                                      | Degree           |      |        |                                    |             |
|                                      | HMSO I           | .739 | .667   | .061                               | 7.273       |
|                                      | HMSO II          | .747 | .680   | .065                               | 7.110       |
|                                      | HMSO IIIN        | .816 | .757   | .072                               | 7.923       |
|                                      | HMSO IIIM        | .701 | 1.581  | .153                               | 16.356      |
|                                      | HMSO IV          | .485 | .379   | .025                               | 5.765       |
|                                      | HMSO V           |      |        |                                    |             |
|                                      | Never smoked     | .369 | .734   | .373                               | 1.442       |
|                                      | Former smoker    | .169 | .613   | .306                               | 1.230       |
|                                      | Current smoker   |      |        |                                    |             |

**e. + Hypertension**

| Moderate to severe cSVD <sup>a</sup> |                  | p    | Exp(B) | 95% Confidence Interval for Exp(B) |             |
|--------------------------------------|------------------|------|--------|------------------------------------|-------------|
|                                      |                  |      |        | Lower Bound                        | Upper Bound |
| 1.00                                 | Intercept        | .819 |        |                                    |             |
|                                      | Male sex         | .007 | .541   | .346                               | .845        |
|                                      | Female sex       |      |        |                                    |             |
|                                      | No qualifying ed | .486 | 1.312  | .611                               | 2.817       |
|                                      | O.level          | .995 | .998   | .505                               | 1.974       |
|                                      | A-level          | .381 | .697   | .311                               | 1.561       |
|                                      | Semi-pro/pro     | .788 | .896   | .401                               | 2.002       |
|                                      | Degree           |      |        |                                    |             |
|                                      | HMSO I           | .701 | .626   | .057                               | 6.818       |
|                                      | HMSO II          | .708 | .638   | .061                               | 6.667       |
|                                      | HMSO II          | .777 | .713   | .068                               | 7.446       |
|                                      | HMSO IIIN        | .743 | 1.477  | .143                               | 15.252      |
|                                      | HMSO IIIM        | .467 | .364   | .024                               | 5.534       |
|                                      | HMSO IV          | .341 | .720   | .366                               | 1.416       |
|                                      | HMSO V           | .157 | .604   | .301                               | 1.214       |
|                                      | Never smoked     |      |        |                                    |             |
|                                      | Former smoker    | .112 | .724   | .486                               | 1.078       |
|                                      | Current smoker   |      |        |                                    |             |
|                                      | No hypertension  |      |        |                                    |             |
|                                      | Hypertension     |      |        |                                    |             |



**Supplementary Table e-5.** Continue

**f. + Father's job class**

| Moderate to severe cSVD <sup>a</sup> | p    | Exp(B) | 95% Confidence Interval for Exp(B) |             |
|--------------------------------------|------|--------|------------------------------------|-------------|
|                                      |      |        | Lower Bound                        | Upper Bound |
| 1.00 Intercept                       | .437 |        |                                    |             |
| age 11 deprivation score             | .286 | 1.047  | .962                               | 1.138       |
| Male sex                             | .006 | .531   | .338                               | .834        |
| Female sex                           |      |        |                                    |             |
| No degree                            | .683 | 1.177  | .538                               | 2.575       |
| O-level                              | .688 | .865   | .427                               | 1.753       |
| A-level                              | .305 | .651   | .286                               | 1.478       |
| Semi-pro/pro                         | .632 | .820   | .364                               | 1.846       |
| Degree                               |      |        |                                    |             |
| HSMO I                               | .696 | .616   | .054                               | 7.011       |
| HMSO II                              | .669 | .594   | .055                               | 6.442       |
| HMSO IIIN                            | .711 | .637   | .059                               | 6.922       |
| HMSO IIIM                            | .815 | 1.326  | .125                               | 14.081      |
| HMSO IV                              | .425 | .326   | .021                               | 5.104       |
| HMSO V                               |      |        |                                    |             |
| Never smoked                         | .391 | .742   | .375                               | 1.467       |
| Former smoker                        | .229 | .649   | .321                               | 1.312       |
| Current smoker                       |      |        |                                    |             |
| No hypertension                      | .077 | .695   | .465                               | 1.040       |
| Hypertension                         |      |        |                                    |             |
| Father's job class I                 | .989 | 1.012  | .201                               | 5.087       |
| Father's job II                      | .174 | 2.276  | .695                               | 7.458       |
| Father's job III                     | .048 | 3.001  | 1.010                              | 8.918       |
| Father's job IV                      | .166 | 2.371  | .698                               | 8.050       |
| Father's job V                       |      |        |                                    |             |

**SUPPLEMENTARY REFERENCES**

1. Satizabal CL, Beiser AS, Chouraki V, Chene G, Dufouil C, Seshadri S. Incidence of Dementia over Three Decades in the Framingham Heart Study. *N Engl J Med* 2016;374:523-532.
2. Dufouil C, Alperovitch A, Tzourio C. Influence of education on the relationship between white matter lesions and cognition. *Neurology* 2003;60:831-836.
3. Lane EM, Paul RH, Moser DJ, Fletcher TD, Cohen RA. Influence of education on subcortical hyperintensities and global cognitive status in vascular dementia. *J Int Neuropsychol Soc* 2011;17:531-536.
4. Farfel JM, Nitrini R, Suemoto CK, et al. Very low levels of education and cognitive reserve: a clinicopathologic study. *Neurology* 2013;81:650-657.
5. Deary IJ, Strand S, Smith P, Fernandes C. Intelligence and educational achievement. *Intelligence* 2007;35:13-21.
6. Johnson W, Deary IJ, Iacono WG. Genetic and Environmental Transactions Underlying

- Educational Attainment. Intelligence 2009;37:466-478.
7. Valdes Hernandez Mdel C, Booth T, Murray C, et al. Brain white matter damage in aging and cognitive ability in youth and older age. *Neurobiol Aging* 2013;34:2740-2747.
  8. Karama S, Bastin ME, Murray C, et al. Childhood cognitive ability accounts for associations between cognitive ability and brain cortical thickness in old age. *Mol Psychiatry* 2014;19:555-559.
  9. Mathers JC, Strathdee G, Relton CL. Induction of epigenetic alterations by dietary and other environmental factors. *Adv Genet* 2010;71:3-39.
  10. McGuinness D, McGlynn LM, Johnson PC, et al. Socio-economic status is associated with epigenetic differences in the pSoBid cohort. *Int J Epidemiol* 2012;41:151-160.
  11. Borghol N, Suderman M, McArdle W, et al. Associations with early-life socio-economic position in adult DNA methylation. *Int J Epidemiol* 2012;41:62-74.
  12. Giles-Corti B, Donovan RJ. The relative influence of individual, social and physical environment determinants of physical activity. *Soc Sci Med* 2002;54:1793-1812.
  13. Prochaska JD, Nolen AB, Kelley H, Sexton K, Linder SH, Sullivan J. Social Determinants of Health in Environmental Justice Communities: Examining Cumulative Risk in Terms of Environmental Exposures and Social Determinants of Health. *Hum Ecol Risk Assess* 2014;20:980-994.
  14. Deary IJ, Weiss A, Batty GD. Intelligence and Personality as Predictors of Illness and Death: How Researchers in Differential Psychology and Chronic Disease Epidemiology Are Collaborating to Understand and Address Health Inequalities. *Psychol Sci Public Interest* 2010;11:53-79.
  15. Barbeau EM, Krieger N, Soobader MJ. Working class matters: socioeconomic disadvantage, race/ethnicity, gender, and smoking in NHIS 2000. *Am J Public Health* 2004;94:269-278.
  16. Cutler DM, Lleras-Muney A. Education and Health: Evaluating Theories and Evidence. National Bureau of Economic Research Working Paper Series 2006;No. 12352.
  17. van Dijk EJ, Prins ND, Vrooman HA, Hofman A, Koudstaal PJ, Breteler MM. Progression of cerebral small vessel disease in relation to risk factors and cognitive consequences: Rotterdam Scan study. *Stroke; a journal of cerebral circulation* 2008;39:2712-2719.
  18. Benavente O, Pearce LA, Andersen D, Bazan C, Hart RG. MRI Predictors of Stroke Recurrence in Patients With Recent Lacunar Stroke: The SPS3 Trial Stroke; a journal of cerebral circulation 2014;45:A66.
